# Supplementary material
Source: Springer Nature journal article supplement (https://www.springermedizin.de/resource/supplementary/12982_2013_113_MOESM4_ESM.pdf/9604216)

A

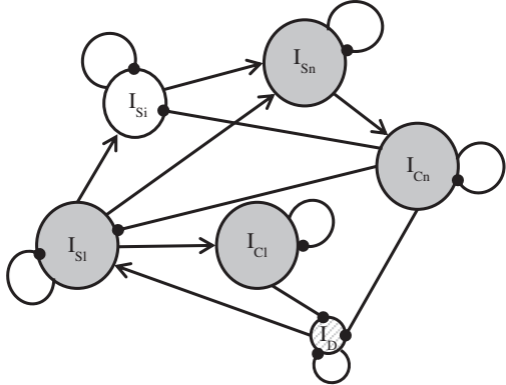

B

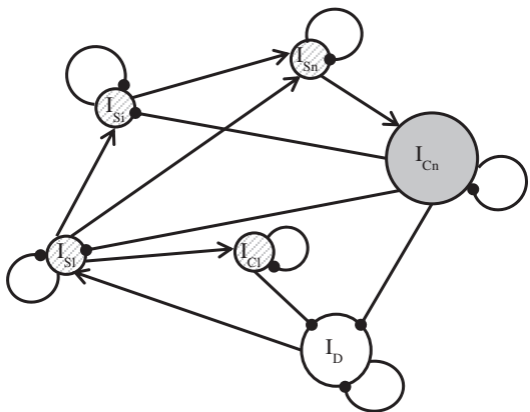

C

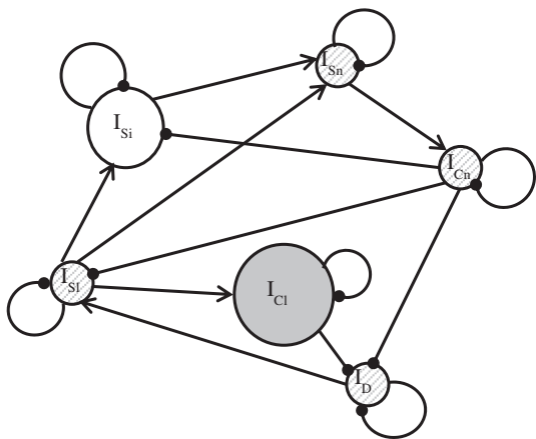

Supplement: MOESM4 [file 9604216]
